# Supplementary material for: Protective Effect of Dexmedetomidine against Hyperoxia-Damaged Cerebellar Neurodevelopment in the Juvenile Rat
Source: MDPI journal article supplement (doi:10.3390/antiox12040980), 2023-04-21
Supplement: s1 [file s1]

**Table S2.** Quantitation of Pax6 and PCNA single and double positive cells of the cerebellar molecular layer.

|                        | NO      | NOD      | HY     | HYD      |
|------------------------|---------|----------|--------|----------|
| <b>hyperoxia</b>       | –       | –        | +      | +        |
| <b>dexmedetomidine</b> | –       | +        | –      | +        |
| <b>P7</b>              |         |          |        |          |
| <b>Pax6+</b>           | 100±8.1 | 97±7.7   | 64±3.3 | 94±2.9   |
| <b>PCNA+</b>           | 100±9.4 | 79±6.4   | 57±2.4 | 81±1.7   |
| <b>Pax6/PCNA+</b>      | 100±6.8 | 93±4.8   | 52±2.5 | 90±2.7   |
| <b>P9</b>              |         |          |        |          |
| <b>Pax6+</b>           | 100±5.7 | 102±11.3 | 93±5.8 | 100±11.0 |
| <b>PCNA+</b>           | 100±8.5 | 86±6.0   | 91±3.2 | 95±5.8   |
| <b>Pax6/PCNA+</b>      | 100±7.4 | 62±6.3   | 69±5.2 | 100±8.2  |
| <b>P11</b>             |         |          |        |          |
| <b>Pax6+</b>           | 100±4.0 | 88±6.3   | 87±4.1 | 99±6.8   |
| <b>PCNA+</b>           | 100±7.0 | 97±6.0   | 74±6.2 | 88±7.1   |
| <b>Pax6/PCNA+</b>      | 100±4.0 | 99±5.9   | 52±2.8 | 101±5.0  |
| <b>P14</b>             |         |          |        |          |
| <b>Pax6+</b>           | 100±7.3 | 116±6.6  | 85±7.0 | 93±7.3   |
| <b>PCNA+</b>           | 100±6.0 | 94±7.9   | 79±3.6 | 108±10.3 |
| <b>Pax6/PCNA+</b>      | 100±5.3 | 61±4.4   | 49±3.2 | 102±6.2  |

Data are normalized to the level of rat pups exposed to normoxia at each time point (control 100 %) and the 100 % values are 61.1 (P7), 67.6 (P9), 63.0 (P11), and 67.2 (P14) Pax6+ cells, and 41.9 (P7), 47.8 (P9), 47.8 (P11), and 47.9 (P14) PCNA+ cells, or 34.1 (P7), 49.8 (P9), 12.3 (P11), and 13.6 (P14) Pax6+/PCNA+ cells per regions of lobules, respectively. n = 6/group. \*p < 0.05, \*\*p < 0.01, \*\*\*p < 0.001, \*\*\*\*p < 0.0001 (ANOVA, Bonferroni's *post hoc* test; Kruskal-Wallis, Dunn's *post hoc* test).
