# Supplementary material for: Protective Effect of Dexmedetomidine against Hyperoxia-Damaged Cerebellar Neurodevelopment in the Juvenile Rat
Source: MDPI journal article supplement (doi:10.3390/antiox12040980), 2023-04-21
Supplement: s1 [file s1]

**Table S3.** Quantification of cerebellar homogenates for Purkinje cells–associated mediators and neurotrophins.

|                        | NO       | NOD      | HY       | HYD      |
|------------------------|----------|----------|----------|----------|
| <b>hyperoxia</b>       | –        | –        | +        | +        |
| <b>dexmedetomidine</b> | –        | +        | –        | +        |
| <b>P7</b>              |          |          |          |          |
| <i>Calb1</i>           | 100±6.9  | 60±8.2   | 68±8.2   | 154±10.1 |
| <i>Shh</i>             | 100±8.6  | 41±7.9   | 48±7.9   | 46±2.8   |
| <i>BDNF</i>            | 100±11.8 | 96±12.8  | 57±5.5   | 56±8.5   |
| <i>NGF</i>             | 100±7.4  | 88±7.0   | 73±2.0   | 121±12.3 |
| <i>NT3</i>             | 100±4.8  | 81±4.7   | 56±10.2  | 52±10.0  |
| <b>P9</b>              |          |          |          |          |
| <i>Calb1</i>           | 100±6.4  | 62±5.3   | 64±7.2   | 87±9.8   |
| <i>Shh</i>             | 100±7.4  | 122±4.8  | 69±6.1   | 81±5.4   |
| <i>BDNF</i>            | 100±12.7 | 109±6.8  | 102±5.3  | 126±7.2  |
| <i>NGF</i>             | 100±8.1  | 98±12.6  | 76±7.2   | 90±8.0   |
| <i>NT3</i>             | 100±3.3  | 71±7.0   | 121±7.6  | 95±9.0   |
| <b>P11</b>             |          |          |          |          |
| <i>Calb1</i>           | 100±4.9  | 162±11.2 | 204±13.7 | 148±12.6 |
| <i>Shh</i>             | 100±5.4  | 90±4.5   | 76±4.4   | 99±7.6   |
| <i>BDNF</i>            | 100±9.2  | 81±7.3   | 90±10.1  | 110±12.9 |
| <i>NGF</i>             | 100±6.6  | 77±9.2   | 121±10.0 | 152±21.7 |
| <i>NT3</i>             | 100±7.0  | 226±7.8  | 205±19.7 | 218±19.0 |
| <b>P14</b>             |          |          |          |          |
| <i>Calb1</i>           | 100±4.8  | 96±5.6   | 101±4.4  | 48±8.6   |
| <i>Shh</i>             | 100±6.0  | 69±5.2   | 70±4.7   | 72±5.5   |
| <i>BDNF</i>            | 100±4.6  | 78±5.6   | 59±4.6   | 97±8.9   |
| <i>NGF</i>             | 100±8.6  | 71±1.7   | 83±5.0   | 110±4.8  |
| <i>NT3</i>             | 100±9.6  | 204±12.1 | 157±7.6  | 101±7.1  |

Data are normalized to the level of rat pups exposed to normoxia at each time point (control 100%).  $n = 6/\text{group}$ . \*  $p < 0.05$ , \*\*  $p < 0.01$ , \*\*\*  $p < 0.001$ , \*\*\*\*  $p < 0.0001$  (ANOVA, Bonferroni's post hoc test; Kruskal–Wallis, Dunn's post hoc test; Brown–Forsythe, Dunnett's post hoc test).
