# Supplementary material for: Protective Effect of Dexmedetomidine against Hyperoxia-Damaged Cerebellar Neurodevelopment in the Juvenile Rat
Source: MDPI journal article supplement (doi:10.3390/antiox12040980), 2023-04-21
Supplement: s1 [file s1]

**Table S5.** Quantification of cerebellar homogenates for survival and development GPC-associated mediators.

|                        | NO       | NOD      | HY       | HYD      |
|------------------------|----------|----------|----------|----------|
| <b>hyperoxia</b>       | –        | –        | +        | +        |
| <b>dexmedetomidine</b> | –        | +        | –        | +        |
| <b>P7</b>              |          |          |          |          |
| <i>NeuroD1</i>         | 100±3.6  | 69±4.9   | 69±5.3   | 69±10.1  |
| <i>NeuN</i>            | 100±3.8  | 34±2.4   | 56±8.0   | 62±5.1   |
| <i>Prox1</i>           | 100±8.5  | 97±4.7   | 74±11.0  | 89±12.5  |
| <i>Chd7</i>            | 100±6.0  | 85±11.1  | 98±9.1   | 142±3.6  |
| <b>P9</b>              |          |          |          |          |
| <i>NeuroD1</i>         | 100±6.9  | 56±10.1  | 57±4.5   | 83±5.2   |
| <i>NeuN</i>            | 100±9.1  | 94±6.8   | 101±8.0  | 87±9.5   |
| <i>Prox1</i>           | 100±10.0 | 94±10.0  | 69±5.8   | 109±7.1  |
| <i>Chd7</i>            | 100±5.9  | 79±7.1   | 94±7.4   | 72±10.1  |
| <b>P11</b>             |          |          |          |          |
| <i>NeuroD1</i>         | 100±8.5  | 139±8.0  | 163±12.4 | 121±5.8  |
| <i>NeuN</i>            | 100±6.2  | 130±10.6 | 142±7.7  | 186±22.0 |
| <i>Prox1</i>           | 100±6.4  | 140±4.4  | 79±6.2   | 96±7.5   |
| <i>Chd7</i>            | 100±9.0  | 127±7.7  | 155±9.0  | 167±16.8 |
| <b>P14</b>             |          |          |          |          |
| <i>NeuroD1</i>         | 100±7.0  | 97±6.7   | 125±6.2  | 58±3.9   |
| <i>NeuN</i>            | 100±6.6  | 100±4.1  | 112±1.9  | 66±8.3   |
| <i>Prox1</i>           | 100±7.2  | 146±6.0  | 82±9.5   | 52±7.3   |
| <i>Chd7</i>            | 100±7.5  | 92±7.2   | 91±7.4   | 48±10.9  |

Data are normalized to the level of rat pups exposed to normoxia at each time point (control 100%).  $n = 6/\text{group}$ . \*  $p < 0.05$ , \*\*  $p < 0.01$ , \*\*\*  $p < 0.001$ , \*\*\*\*  $p < 0.0001$  (ANOVA, Bonferroni's post hoc test; Kruskal–Wallis, Dunn's post hoc test; Brown–Forsythe, Dunnett's post hoc test).
