# Supplementary material for: Protective Effect of Dexmedetomidine against Hyperoxia-Damaged Cerebellar Neurodevelopment in the Juvenile Rat
Source: MDPI journal article supplement (doi:10.3390/antiox12040980), 2023-04-21
Supplement: s1 [file s1]

**Table S7.** Quantification of cerebellar homogenates for UBC- and CN-associated mediators.

|                        | NO         | NOD        | HY        | HYD        |
|------------------------|------------|------------|-----------|------------|
| <b>hyperoxia</b>       | –          | –          | +         | +          |
| <b>dexmedetomidine</b> | –          | +          | –         | +          |
| <b>P7</b>              |            |            |           |            |
| <i>Tbr1</i>            | 100 ± 7.4  | 52 ± 7.5   | 71 ± 1.3  | 210 ± 35.5 |
| <i>Tbr2</i>            | 100 ± 3.2  | 90 ± 5.6   | 54 ± 3.8  | 136 ± 6.9  |
| <b>P9</b>              |            |            |           |            |
| <i>Tbr1</i>            | 100 ± 18.0 | 82 ± 13.1  | 82 ± 7.6  | 146 ± 16.6 |
| <i>Tbr2</i>            | 100 ± 5.5  | 71 ± 12.0  | 72 ± 4.7  | 157 ± 17.7 |
| <b>P11</b>             |            |            |           |            |
| <i>Tbr1</i>            | 100 ± 8.7  | 163 ± 10.2 | 77 ± 2.5  | 120 ± 3.5  |
| <i>Tbr2</i>            | 100 ± 7.5  | 161 ± 8.3  | 89 ± 8.2  | 150 ± 9.0  |
| <b>P14</b>             |            |            |           |            |
| <i>Tbr1</i>            | 100 ± 6.1  | 141 ± 14.3 | 41 ± 6.6  | 81 ± 7.4   |
| <i>Tbr2</i>            | 100 ± 6.4  | 198 ± 10.4 | 125 ± 4.3 | 137 ± 8.8  |

Data are normalized to the level of rat pups exposed to normoxia at each time point (control 100%). *n* = 6/group. \* *p* < 0.05, \*\* *p* < 0.01, \*\*\* *p* < 0.001, \*\*\*\* *p* < 0.0001 (ANOVA, Bonferroni's post hoc test; Kruskal–Wallis, Dunn's post hoc test; Brown–Forsythe, Dunnett's post hoc test).
