# Supplementary material for: Protective Effect of Dexmedetomidine against Hyperoxia-Damaged Cerebellar Neurodevelopment in the Juvenile Rat
Source: MDPI journal article supplement (doi:10.3390/antiox12040980), 2023-04-21
Supplement: s1 [file s1]

**Table S6.** Quantification of cerebellar homogenates for survival and development GC-associated mediators.

|                        | NO       | NOD     | HY      | HYD     |
|------------------------|----------|---------|---------|---------|
| <b>hyperoxia</b>       | –        | –       | +       | +       |
| <b>dexmedetomidine</b> | –        | +       | –       | +       |
| <b>P7</b>              |          |         |         |         |
| <i>Pax2</i>            | 100±8.9  | 50±3.1  | 106±3.8 | 109±3.4 |
| <i>NeuroD2</i>         | 100±5.7  | 61±3.1  | 60±5.3  | 132±5.9 |
| <i>Syp</i>             | 100±10.3 | 34±7.8  | 36±5.2  | 38±3.5  |
| <i>Sox2</i>            | 100±8.7  | 34±4.2  | 49±6.8  | 50±3.2  |
| <b>P9</b>              |          |         |         |         |
| <i>Pax2</i>            | 100±5.1  | 89±7.3  | 102±4.7 | 111±4.9 |
| <i>NeuroD2</i>         | 100±4.2  | 65±10.3 | 69±7.3  | 73±14.8 |
| <i>Syp</i>             | 100±5.7  | 92±5.0  | 62±4.1  | 72±6.5  |
| <i>Sox2</i>            | 100±8.1  | 113±4.7 | 77±2.8  | 84±7.8  |
| <b>P11</b>             |          |         |         |         |
| <i>Pax2</i>            | 100±4.0  | 94±6.4  | 104±7.5 | 104±5.3 |
| <i>NeuroD2</i>         | 100±5.8  | 117±6.5 | 126±3.1 | 87±12.5 |
| <i>Syp</i>             | 100±2.9  | 72±3.0  | 85±1.5  | 98±5.0  |
| <i>Sox2</i>            | 100±5.0  | 95±4.6  | 108±5.8 | 116±8.0 |
| <b>P14</b>             |          |         |         |         |
| <i>Pax2</i>            | 100±5.9  | 83±7.1  | 100±6.7 | 93±6.7  |
| <i>NeuroD2</i>         | 100±9.3  | 94±4.4  | 115±7.2 | 59±3.5  |
| <i>Syp</i>             | 100±6.5  | 78±3.1  | 83±4.1  | 75±2.3  |
| <i>Sox2</i>            | 100±5.7  | 87±3.5  | 100±7.1 | 106±5.0 |

Data are normalized to the level of rat pups exposed to normoxia at each time point (control 100%).  $n = 6/\text{group}$ . \*  $p < 0.05$ , \*\*  $p < 0.01$ , \*\*\*  $p < 0.001$ , \*\*\*\*  $p < 0.0001$  (ANOVA, Bonferroni's post hoc test; Kruskal–Wallis, Dunn's post hoc test; Brown–Forsythe, Dunnett's post hoc test).
