# Supplementary material for: Protective Effect of Dexmedetomidine against Hyperoxia-Damaged Cerebellar Neurodevelopment in the Juvenile Rat
Source: MDPI journal article supplement (doi:10.3390/antiox12040980), 2023-04-21
Supplement: s1 [file s1]

**Table S4.** Quantification of cerebellar homogenates for proliferating and migrating GPC-associated mediators.

|                        | NO      | NOD      | HY       | HYD      |
|------------------------|---------|----------|----------|----------|
| <b>hyperoxia</b>       | –       | –        | +        | +        |
| <b>dexmedetomidine</b> | –       | +        | –        | +        |
| <b>P7</b>              |         |          |          |          |
| <i>CycD2</i>           | 100±4.8 | 71±8.6   | 61±7.4   | 154±9.0  |
| <i>Pax6</i>            | 100±8.5 | 53±10.7  | 52±8.5   | 161±12.7 |
| <i>Lma1α</i>           | 100±7.1 | 36±5.9   | 45±11.7  | 47±8.3   |
| <i>Sema6a</i>          | 100±5.4 | 63±3.9   | 69±9.7   | 96±8.3   |
| <b>P9</b>              |         |          |          |          |
| <i>CycD2</i>           | 100±7.4 | 48±10.4  | 47±7.0   | 71±6.5   |
| <i>Pax6</i>            | 100±5.7 | 76±13.4  | 64±6.4   | 82±15.5  |
| <i>Lma1α</i>           | 100±6.7 | 96±8.6   | 54±8.1   | 67±7.7   |
| <i>Sema6a</i>          | 100±5.7 | 96±6.5   | 84±1.2   | 84±8.0   |
| <b>P11</b>             |         |          |          |          |
| <i>CycD2</i>           | 100±9.2 | 125±9.1  | 161±12.9 | 97±6.9   |
| <i>Pax6</i>            | 100±7.2 | 159±8.6  | 97±7.6   | 123±11.3 |
| <i>Lma1α</i>           | 100±5.9 | 91±6.5   | 99±6.9   | 100±9.8  |
| <i>Sema6a</i>          | 100±5.8 | 127±6.1  | 151±6.8  | 134±15.3 |
| <b>P14</b>             |         |          |          |          |
| <i>CycD2</i>           | 100±5.5 | 161±15.0 | 140±18.6 | 65±12.2  |
| <i>Pax6</i>            | 100±4.6 | 154±11.1 | 129±5.4  | 42±10.6  |
| <i>Lma1α</i>           | 100±6.4 | 80±3.1   | 81±3.3   | 134±6.4  |
| <i>Sema6a</i>          | 100±5.9 | 85±5.1   | 79±7.8   | 56±6.1   |

Data are normalized to the level of rat pups exposed to normoxia at each time point (control 100%).  $n = 6/\text{group}$ . \*  $p < 0.05$ , \*\*  $p < 0.01$ , \*\*\*  $p < 0.001$ , \*\*\*\*  $p < 0.0001$  (ANOVA, Bonferroni's post hoc test; Kruskal–Wallis, Dunn's post hoc test; Brown–Forsythe, Dunnett's post hoc test).
